# Supplementary material
Source: PubMed Central journal article supplement (PMC4378175)
Supplement: supp_pp.15.00021_00021revsupptbl1.pdf [file supp_pp.15.00021_00021revsupptbl1.pdf]

**Supplemental Table S1.** Up-regulated gene by the overexpression of *CRCT* analyzed by microarray.

Top 50 of up-regulated genes showing average signal intensity of Cyanine-3 and Cyanine-5 above 10 and  $P < 0.05$  are listed. Ratio of change and signal average are expressed as means of four replicates.

| Rank | Description                                         | RAP-DB       | Ratio of change | Signal av. | P-value |
|------|-----------------------------------------------------|--------------|-----------------|------------|---------|
| 1    | Hypothetical protein.                               | Os07g0511400 | 501.42          | 6896.13    | 0.005   |
| 2    | Conserved hypothetical protein.                     | Os03g0115800 | 181.17          | 8154.87    | 0.001   |
| 3    | Hypothetical protein.                               | Os06g0265100 | 134.73          | 522.10     | 0.001   |
| 4    | Conserved hypothetical protein.                     | Os01g0692400 | 120.31          | 263.06     | 0.006   |
| 5    | BURP domain containing protein.                     | Os10g0409400 | 86.34           | 4385.25    | 0.030   |
| 6    | Conserved hypothetical protein.                     | Os07g0122000 | 60.49           | 741.52     | 0.006   |
| 7    | Conserved hypothetical protein.                     | Os05g0296200 | 58.46           | 125.13     | 0.004   |
| 8    | Conserved hypothetical protein.                     | Os01g0155800 | 56.28           | 16740.17   | 0.046   |
| 9    | Hypothetical protein.                               | Os06g0579600 | 48.70           | 15018.20   | 0.039   |
| 10   | Glycine-rich protein precursor.                     | Os07g0511100 | 47.53           | 655.96     | 0.002   |
| 11   | ZIM domain containing protein.                      | Os07g0153000 | 21.44           | 134.79     | 0.001   |
| 12   | Xylanase inhibitor protein I precursor.             | Os07g0632000 | 20.59           | 441.35     | 0.044   |
| 13   | Conserved hypothetical protein.                     | Os04g0677000 | 20.54           | 57.66      | 0.001   |
| 14   | (No Hit)                                            | Os05g0438300 | 20.49           | 116.89     | 0.002   |
| 15   | Hypothetical protein.                               | Os06g0261300 | 19.79           | 200.50     | 0.000   |
| 16   | Conserved hypothetical protein.                     | Os07g0442800 | 19.57           | 82.29      | 0.035   |
| 17   | (No Hit)                                            | Os11g0491900 | 18.56           | 48.03      | 0.003   |
| 18   | Zn-finger, Dof type domain containing protein.      | Os02g0252400 | 17.59           | 58.58      | 0.018   |
| 19   | (No Hit)                                            | Os04g0607800 | 16.45           | 49.26      | 0.002   |
| 20   | Protein kinase domain containing protein.           | Os11g0556400 | 15.27           | 36.83      | 0.017   |
| 21   | Homeodomain-like containing protein.                | Os11g0282700 | 14.37           | 45.39      | 0.004   |
| 22   | Conserved hypothetical protein.                     | Os04g0387300 | 14.01           | 144.86     | 0.000   |
| 23   | Conserved hypothetical protein.                     | Os04g0115200 | 12.39           | 86.36      | 0.032   |
| 24   | (No Hit)                                            | Os08g0213100 | 11.62           | 40.05      | 0.006   |
| 25   | Conserved hypothetical protein.                     | Os05g0472600 | 10.74           | 79.48      | 0.006   |
| 26   | Synaptojanin, N-terminal domain containing protein. | Os10g0390900 | 10.28           | 34.65      | 0.015   |
| 27   | Conserved hypothetical protein.                     | Os06g0200800 | 10.22           | 39.20      | 0.023   |

|    |                                                             |              |      |          |       |
|----|-------------------------------------------------------------|--------------|------|----------|-------|
| 28 | (No Hit)                                                    | Os05g0211800 | 9.97 | 22.26    | 0.002 |
| 29 | Vacuolar protein-sorting protein 45 homolog (AtVPS45).      | Os02g0437800 | 9.82 | 60.39    | 0.023 |
| 30 | (No Hit)                                                    | Os11g0636200 | 9.70 | 142.02   | 0.000 |
| 31 | (No Hit)                                                    | Os05g0417400 | 9.54 | 21.31    | 0.005 |
| 32 | Hypothetical protein.                                       | Os12g0117700 | 9.27 | 252.34   | 0.006 |
| 33 | Protein of unknown function DUF635 family protein.          | Os01g0872900 | 9.10 | 95.82    | 0.003 |
| 34 | Hypothetical protein.                                       | Os05g0580100 | 8.68 | 44.08    | 0.009 |
| 35 | Hypothetical protein.                                       | Os12g0508400 | 8.48 | 66.74    | 0.007 |
| 36 | Homeodomain-like containing protein.                        | Os01g0873000 | 8.42 | 39.76    | 0.006 |
| 37 | Non-protein coding transcript, unclassifiable transcript.   | Os04g0397800 | 8.37 | 19.65    | 0.023 |
| 38 | Cold acclimation protein COR413-TM1.                        | Os05g0566800 | 8.23 | 14655.81 | 0.015 |
| 39 | Hypothetical protein.                                       | Os06g0271400 | 8.15 | 177.12   | 0.022 |
| 40 | 2OG-Fe(II) oxygenase domain containing protein.             | Os07g0103500 | 7.76 | 114.51   | 0.018 |
| 41 | Hypothetical protein.                                       | Os08g0441700 | 7.18 | 1397.42  | 0.005 |
| 42 | Zn-finger, PMZ type domain containing protein.              | Os07g0627100 | 6.58 | 80.08    | 0.030 |
| 43 | (No Hit)                                                    | Os01g0225700 | 6.11 | 19.98    | 0.013 |
| 44 | (No Hit)                                                    | Os08g0559800 | 5.93 | 18.06    | 0.001 |
| 45 | Iron/ascorbate-dependent oxidoreductase.                    | Os02g0320800 | 5.85 | 21.30    | 0.000 |
| 46 | Plant protein of unknown function family protein.           | Os05g0130400 | 5.73 | 23.95    | 0.004 |
| 47 | Conserved hypothetical protein.                             | Os03g0383100 | 5.46 | 14.67    | 0.028 |
| 48 | Cytochrome P450 family protein.                             | Os10g0524700 | 5.40 | 1240.99  | 0.015 |
| 49 | Protein of unknown function DUF6 domain containing protein. | Os04g0457300 | 5.37 | 94.51    | 0.024 |
| 50 | (No Hit)                                                    | Os04g0330800 | 5.23 | 450.52   | 0.007 |
