# Supplementary material
Source: PubMed Central journal article supplement (PMC4378175)
Supplement: supp_pp.15.00021_00021revsupptbl2.pdf [file supp_pp.15.00021_00021revsupptbl2.pdf]

**Supplemental Table S2.** Down-regulated gene by the overexpression of *CRCT* analyzed by microarray.

Top 50 of down-regulated genes showing average signal intensity of Cyanine-3 and Cyanine-5 above 10 and  $P < 0.05$  are listed. Ratio of change and signal average are expressed as means of four replicates.

| Rank | Description                                                                 | RAP-DB       | Ratio of change | Signal av. | P-value |
|------|-----------------------------------------------------------------------------|--------------|-----------------|------------|---------|
| 1    | Peptidase S10, serine carboxypeptidase family protein.                      | Os11g0461000 | 0.12            | 92.68      | 0.00    |
| 2    | Hypothetical protein.                                                       | Os05g0227100 | 0.17            | 1569.43    | 0.00    |
| 3    | Box protein (MADS box protein MADS1).                                       | Os03g0215400 | 0.20            | 82.39      | 0.02    |
| 4    | Hypothetical protein.                                                       | Os12g0406000 | 0.21            | 271.26     | 0.00    |
| 5    | (No Hit)                                                                    | Os03g0323700 | 0.21            | 42.34      | 0.02    |
| 6    | Hypothetical protein.                                                       | Os02g0452900 | 0.22            | 13.14      | 0.01    |
| 7    | Terpene synthase-like domain containing protein.                            | Os03g0348200 | 0.24            | 188.19     | 0.01    |
| 8    | Beta-amyrin synthase.                                                       | Os11g0285000 | 0.25            | 63.52      | 0.00    |
| 9    | SP3D.                                                                       | Os01g0218500 | 0.25            | 59.99      | 0.00    |
| 10   | MADS15 protein.                                                             | Os07g0108900 | 0.25            | 15.63      | 0.00    |
| 11   | Acid phosphatase (Class B) family protein.                                  | Os05g0191500 | 0.26            | 15.76      | 0.01    |
| 12   | miRNA                                                                       | osa-miR443   | 0.26            | 11.10      | 0.03    |
| 13   | O-methyltransferase, family 2 domain containing protein.                    | Os04g0196200 | 0.28            | 11.90      | 0.01    |
| 14   | Ent-kaurene oxidase (AtKO1) (Cytochrome P450 701A3).                        | Os06g0569500 | 0.28            | 47.98      | 0.00    |
| 15   | 4-coumarate--CoA ligase 2 (4CL 2) (4-coumaroyl-CoA synthase 2).             | Os02g0697400 | 0.29            | 534.55     | 0.00    |
| 16   | TPR-like domain containing protein.                                         | Os08g0481000 | 0.29            | 29.18      | 0.00    |
| 17   | FAD-dependent pyridine nucleotide-disulphide oxidoreductase family protein. | Os07g0111900 | 0.30            | 76.22      | 0.00    |
| 18   | UDP-glucuronosyl/UDP-glucosyltransferase family protein.                    | Os01g0735300 | 0.30            | 143.65     | 0.01    |
| 19   | TPR-like domain containing protein.                                         | Os06g0700100 | 0.30            | 11.10      | 0.00    |
| 20   | Protein kinase domain containing protein.                                   | Os09g0359500 | 0.30            | 10.72      | 0.02    |
| 21   | Flavonoid 3'-monooxygenase (Cytochrome P450 75B2).                          | Os10g0320100 | 0.30            | 4962.07    | 0.00    |
| 22   | Cytochrome P450 family protein.                                             | Os06g0640500 | 0.30            | 144.38     | 0.00    |
| 23   | Zeaxanthin cleavage oxygenase.                                              | Os12g0435200 | 0.30            | 99.20      | 0.02    |
| 24   | Lectin-like receptor kinase 7;2                                             | Os07g0130900 | 0.31            | 35.80      | 0.00    |
| 25   | Disease resistance protein                                                  | Os06g0267900 | 0.31            | 253.28     | 0.01    |

|    |                                                               |              |      |         |      |
|----|---------------------------------------------------------------|--------------|------|---------|------|
|    | family protein.                                               |              |      |         |      |
| 26 | MtN3 and saliva related transmembrane protein family protein. | Os09g0254600 | 0.31 | 10.42   | 0.01 |
| 27 | Hypothetical protein.                                         | Os07g0209500 | 0.31 | 18.19   | 0.00 |
| 28 | UDP-glucuronosyl/UDP-glucosyltransferase family protein.      | Os05g0527900 | 0.32 | 25.74   | 0.00 |
| 29 | Conserved hypothetical protein.                               | Os01g0339500 | 0.32 | 26.94   | 0.01 |
| 30 | Transcription factor, MADS-box domain containing protein.     | Os03g0752800 | 0.32 | 70.04   | 0.00 |
| 31 | Non-protein coding transcript, unclassifiable transcript.     | Os01g0647200 | 0.32 | 1371.01 | 0.01 |
| 32 | Serine/threonine protein kinase family protein.               | Os07g0131000 | 0.33 | 13.99   | 0.01 |
| 33 | Cytochrome P450 family protein.                               | Os10g0440000 | 0.33 | 1155.09 | 0.00 |
| 34 | miRNA                                                         | osa-miR397b  | 0.33 | 10.76   | 0.02 |
| 35 | Isopenicillin N synthase family protein.                      | Os04g0522500 | 0.33 | 1483.42 | 0.02 |
| 36 | Conserved hypothetical protein.                               | Os02g0587600 | 0.34 | 10.13   | 0.02 |
| 37 | Retrotransposon gag protein family protein.                   | Os08g0315200 | 0.34 | 12.76   | 0.00 |
| 38 | UDP-glucuronosyl/UDP-glucosyltransferase family protein.      | Os03g0358800 | 0.34 | 11.25   | 0.00 |
| 39 | GOS9 protein.                                                 | Os03g0399900 | 0.34 | 391.18  | 0.00 |
| 40 | Anthocyaninless2.                                             | Os08g0136100 | 0.35 | 13.29   | 0.02 |
| 41 | Conserved hypothetical protein.                               | Os07g0170800 | 0.35 | 231.79  | 0.01 |
| 42 | E-class P450, group I family protein.                         | Os08g0507100 | 0.35 | 19.60   | 0.02 |
| 43 | OsPK4.                                                        | Os01g0206300 | 0.35 | 12.87   | 0.01 |
| 44 | Calcium-dependent protein kinase, isoform 11 (CDPK 11).       | Os04g0503200 | 0.35 | 40.51   | 0.00 |
| 45 | (No Hit)                                                      | Os08g0470000 | 0.36 | 11.77   | 0.01 |
| 46 | (No Hit)                                                      | Os01g0735400 | 0.36 | 110.44  | 0.00 |
| 47 | Conserved hypothetical protein.                               | Os05g0569900 | 0.36 | 14.48   | 0.00 |
| 48 | Conserved hypothetical protein.                               | Os05g0367200 | 0.37 | 132.25  | 0.01 |
| 49 | Transcription factor MADS23.                                  | Os08g0431900 | 0.37 | 12.69   | 0.00 |
| 50 | Protein of unknown function DUF635 family protein.            | Os12g0550700 | 0.37 | 11.92   | 0.01 |
