# Supplementary material
Source: PubMed Central journal article supplement (PMC4378175)
Supplement: supp_pp.15.00021_00021revsupptbl3.pdf [file supp_pp.15.00021_00021revsupptbl3.pdf]

**Supplemental Table S3.** Up-regulated gene by the knockdown of *CRCT* analyzed by microarray.

Top 50 of up-regulated genes showing average signal intensity of Cyanine-3 and Cyanine-5 above 10 and  $P < 0.05$  are listed. Ratio of change and signal average are expressed as means of four replicates.

| Rank | Description                                               | RAP-DB       | Ratio of change | Signal av. | P-value |
|------|-----------------------------------------------------------|--------------|-----------------|------------|---------|
| 1    | Hypothetical protein.                                     | Os07g0511400 | 689.86          | 6798.62    | 0.000   |
| 2    | Conserved hypothetical protein.                           | Os03g0115800 | 211.87          | 4345.92    | 0.000   |
| 3    | Conserved hypothetical protein.                           | Os10g0371600 | 166.94          | 3121.52    | 0.000   |
| 4    | Hypothetical protein.                                     | Os06g0265100 | 114.76          | 231.30     | 0.000   |
| 5    | Conserved hypothetical protein.                           | Os01g0692400 | 112.31          | 187.29     | 0.000   |
| 6    | Glycine-rich protein precursor.                           | Os07g0511100 | 75.47           | 553.50     | 0.001   |
| 7    | Conserved hypothetical protein.                           | Os02g0772100 | 50.11           | 118.70     | 0.001   |
| 8    | Conserved hypothetical protein.                           | Os07g0122000 | 41.09           | 351.54     | 0.000   |
| 9    | Conserved hypothetical protein.                           | Os05g0296200 | 40.56           | 59.77      | 0.000   |
| 10   | Zn-finger, Dof type domain containing protein.            | Os02g0252400 | 19.30           | 41.30      | 0.003   |
| 11   | Conserved hypothetical protein.                           | Os04g0677000 | 12.72           | 30.95      | 0.000   |
| 12   | Nonaspanin (TM9SF) family protein.                        | Os08g0288400 | 10.67           | 17.54      | 0.048   |
| 13   | Conserved hypothetical protein.                           | Os03g0383100 | 10.26           | 15.39      | 0.000   |
| 14   | Non-protein coding transcript, unclassifiable transcript. | Os04g0397800 | 10.17           | 16.33      | 0.001   |
| 15   | Hypothetical protein.                                     | Os06g0261300 | 9.93            | 89.51      | 0.000   |
| 16   | Hypothetical protein.                                     | Os11g0514800 | 9.48            | 22.49      | 0.017   |
| 17   | Conserved hypothetical protein.                           | Os05g0124700 | 9.27            | 18.25      | 0.000   |
| 18   | (No Hit)                                                  | Os08g0316400 | 8.52            | 2032.25    | 0.001   |
| 19   | Conserved hypothetical protein.                           | Os07g0442800 | 8.40            | 29.44      | 0.003   |
| 20   | (No Hit)                                                  | Os03g0446000 | 8.30            | 2066.08    | 0.002   |
| 21   | (No Hit)                                                  | Os07g0229600 | 8.11            | 2060.17    | 0.002   |
| 22   | Conserved hypothetical protein.                           | Os06g0273400 | 8.00            | 22.29      | 0.003   |
| 23   | (No Hit)                                                  | Os04g0575900 | 7.99            | 2079.15    | 0.002   |
| 24   | Conserved hypothetical protein.                           | Os04g0115200 | 7.62            | 30.34      | 0.002   |
| 25   | Conserved hypothetical protein.                           | Os07g0573000 | 7.61            | 18.92      | 0.019   |
| 26   | (No Hit)                                                  | Os02g0209900 | 7.59            | 11.79      | 0.002   |
| 27   | Conserved hypothetical protein.                           | Os01g0210300 | 7.58            | 20.70      | 0.013   |
| 28   | Peroxidase 1.                                             | Os07g0639400 | 7.58            | 12.32      | 0.002   |
| 29   | (No Hit)                                                  | Os01g0225700 | 7.47            | 18.72      | 0.001   |

|    |                                                                                             |              |      |        |       |
|----|---------------------------------------------------------------------------------------------|--------------|------|--------|-------|
| 30 | miRNA                                                                                       | osa-miR169n  | 7.34 | 13.15  | 0.000 |
| 31 | Alpha-amylase/subtilisin inhibitor (RASI).                                                  | Os04g0526600 | 7.28 | 19.85  | 0.002 |
| 32 | Legume lectin, beta domain containing protein.                                              | Os04g0141400 | 7.13 | 12.07  | 0.019 |
| 33 | Conserved hypothetical protein.                                                             | Os11g0579100 | 6.97 | 16.75  | 0.035 |
| 34 | PR1a protein.                                                                               | Os07g0124900 | 6.77 | 750.77 | 0.003 |
| 35 | Xyloglucan 6-xylosyltransferase (AtXT1).                                                    | Os12g0149300 | 6.58 | 13.64  | 0.001 |
| 36 | Hypothetical protein.                                                                       | Os05g0330100 | 6.39 | 14.32  | 0.000 |
| 37 | Oleosin Zm-I (Oleosin 16 kDa) (Lipid body-associated protein L3).                           | Os04g0546500 | 6.39 | 13.85  | 0.004 |
| 38 | Protein of unknown function DUF1264 family protein.                                         | Os05g0569500 | 6.31 | 25.10  | 0.020 |
| 39 | miRNA                                                                                       | osa-miR169f  | 6.29 | 22.41  | 0.035 |
| 40 | GRF zinc finger domain containing protein.                                                  | Os03g0164200 | 6.27 | 10.50  | 0.002 |
| 41 | Hypothetical protein.                                                                       | Os05g0580100 | 6.23 | 12.13  | 0.034 |
| 42 | Hypothetical protein.                                                                       | Os04g0168300 | 6.12 | 10.64  | 0.000 |
| 43 | Chalcone synthase J (Naringenin-chalcone synthase J).                                       | Os05g0212900 | 6.04 | 15.05  | 0.040 |
| 44 | Nitrilase/cyanide hydratase and apolipoprotein N-acyltransferase domain containing protein. | Os06g0205800 | 5.89 | 12.98  | 0.003 |
| 45 | (No Hit)                                                                                    | Os11g0491900 | 5.85 | 13.04  | 0.022 |
| 46 | (No Hit)                                                                                    | Os04g0607800 | 5.67 | 12.49  | 0.021 |
| 47 | Conserved hypothetical protein.                                                             | Os06g0200800 | 5.66 | 21.26  | 0.003 |
| 48 | miRNA                                                                                       | osa-miR395e  | 5.54 | 11.92  | 0.003 |
| 49 | Glycoside hydrolase, family 1 protein.                                                      | Os09g0511900 | 5.52 | 28.85  | 0.045 |
| 50 | Allyl alcohol dehydrogenase.                                                                | Os12g0227400 | 5.52 | 10.45  | 0.048 |
