# Supplementary material
Source: PubMed Central journal article supplement (PMC4378175)
Supplement: supp_pp.15.00021_00021revsupptbl4.pdf [file supp_pp.15.00021_00021revsupptbl4.pdf]

**Supplemental Table S4.** Down-regulated gene by the overexpression of *CRCT* analyzed by microarray.

Top 50 of down-regulated genes showing average signal intensity of Cyanine-3 and Cyanine-5 above 10 and  $P < 0.05$  are listed. Ratio of change and signal average are expressed as means of four replicates.

| Rank | Description                                               | RAP-DB       | Ratio of change | Signal av. | P-value |
|------|-----------------------------------------------------------|--------------|-----------------|------------|---------|
| 1    | (No Hit)                                                  | Os03g0323700 | 0.09            | 27.95      | 0.000   |
| 2    | Peptidase S10, serine carboxypeptidase family protein.    | Os11g0461000 | 0.12            | 61.85      | 0.004   |
| 3    | Pectinesterase family protein.                            | Os03g0399000 | 0.13            | 25.22      | 0.000   |
| 4    | Heat shock protein 26.                                    | Os03g0245800 | 0.14            | 453.61     | 0.037   |
| 5    | ADP-glucose pyrophosphorylase large subunit 1 (AGPL1).    | Os05g0580000 | 0.18            | 7855.33    | 0.000   |
| 6    | Cytochrome P450 family protein.                           | Os10g0524700 | 0.21            | 178.49     | 0.000   |
| 7    | CO <sub>2</sub> Responsive CCT Protein (CRCT)             | Os05g0595300 | 0.22            | 1562.09    | 0.000   |
| 8    | Hypothetical protein.                                     | Os12g0117700 | 0.25            | 23.68      | 0.036   |
| 9    | Ankyrin repeat containing protein.                        | Os05g0124000 | 0.25            | 11.83      | 0.026   |
| 10   | Retrotransposon gag protein family protein.               | Os08g0315200 | 0.26            | 12.16      | 0.002   |
| 11   | Hypothetical protein.                                     | Os11g0294300 | 0.28            | 10.10      | 0.000   |
| 12   | Plastidial $\alpha$ -glucan phosphorylase 1 (Pho1).       | Os03g0758100 | 0.30            | 7151.93    | 0.000   |
| 13   | Hypothetical protein.                                     | Os02g0452900 | 0.31            | 11.48      | 0.003   |
| 14   | TPR-like domain containing protein.                       | Os08g0481000 | 0.31            | 23.78      | 0.001   |
| 15   | Anthocyaninless2.                                         | Os08g0136100 | 0.33            | 10.58      | 0.000   |
| 16   | Terpene synthase-like domain containing protein.          | Os04g0344100 | 0.33            | 228.65     | 0.018   |
| 17   | Caffeic acid O-methyltransferase (EC 2.1.1.6).            | Os04g0175600 | 0.35            | 535.17     | 0.004   |
| 18   | Zn-finger, CCHC type domain containing protein.           | Os06g0583500 | 0.36            | 106.39     | 0.000   |
| 19   | Hypothetical protein.                                     | Os10g0146300 | 0.36            | 10.42      | 0.003   |
| 20   | Conserved hypothetical protein.                           | Os01g0339500 | 0.36            | 20.40      | 0.001   |
| 21   | Conserved hypothetical protein.                           | Os09g0256700 | 0.36            | 34.58      | 0.005   |
| 22   | Granule-bound starch synthase II (GBSSII).                | Os07g0412100 | 0.37            | 363.17     | 0.002   |
| 23   | Hypothetical protein.                                     | Os11g0626700 | 0.37            | 33.04      | 0.010   |
| 24   | Zn-finger, CCHC type domain containing protein.           | Os02g0552700 | 0.37            | 174.30     | 0.003   |
| 25   | Starch-branching enzyme I (BEI).                          | Os06g0726400 | 0.37            | 3188.19    | 0.000   |
| 26   | S-adenosyl-L-methionine: beta-alanine N-methyltransferase | Os04g0176200 | 0.37            | 18.04      | 0.000   |
| 27   | Hypothetical protein.                                     | Os11g0692700 | 0.38            | 14.47      | 0.002   |
| 28   | Non-protein coding transcript, unclassifiable transcript. | Os01g0261000 | 0.38            | 10.06      | 0.001   |

|    |                                                                                       |              |      |          |       |
|----|---------------------------------------------------------------------------------------|--------------|------|----------|-------|
| 29 | Conserved hypothetical protein.                                                       | Os01g0507400 | 0.38 | 15.80    | 0.001 |
| 30 | Conserved hypothetical protein.                                                       | Os10g0445700 | 0.38 | 11.62    | 0.007 |
| 31 | ADP-glucose pyrophosphorylase small subunit I (AGPS1).                                | Os09g0298200 | 0.39 | 11693.51 | 0.000 |
| 32 | Hypothetical protein.                                                                 | Os06g0322400 | 0.40 | 21.54    | 0.009 |
| 33 | Peptidase C1A, papain family protein.                                                 | Os09g0381400 | 0.40 | 10.53    | 0.001 |
| 34 | Transferase family protein.                                                           | Os02g0484600 | 0.40 | 10.13    | 0.005 |
| 35 | Transposase, IS4 family protein.                                                      | Os10g0143400 | 0.41 | 313.31   | 0.001 |
| 36 | Cellular retinaldehyde-binding/triple function, N-terminal domain containing protein. | Os07g0456500 | 0.41 | 11.32    | 0.021 |
| 37 | Autophagy protein Apg6 family protein.                                                | Os03g0258500 | 0.41 | 30.62    | 0.008 |
| 38 | Pectate lyase/Amb allergen family protein.                                            | Os06g0584000 | 0.42 | 10.53    | 0.001 |
| 39 | OsPK4.                                                                                | Os01g0206300 | 0.42 | 10.04    | 0.008 |
| 40 | Lipase, class 3 family protein.                                                       | Os01g0900400 | 0.42 | 20.02    | 0.010 |
| 41 | Hypothetical protein.                                                                 | Os08g0233500 | 0.42 | 10.77    | 0.003 |
| 42 | Hypothetical protein.                                                                 | Os04g0489900 | 0.42 | 139.56   | 0.000 |
| 43 | Phospholipase D nu-2 (Fragment).                                                      | Os02g0120200 | 0.42 | 10.37    | 0.004 |
| 44 | Cold acclimation protein COR413-TM1.                                                  | Os05g0566800 | 0.42 | 1970.85  | 0.002 |
| 45 | Hypothetical protein.                                                                 | Os12g0406000 | 0.43 | 229.87   | 0.002 |
| 46 | Conserved hypothetical protein.                                                       | Os02g0253700 | 0.43 | 13.04    | 0.012 |
| 47 | Starch debranching enzyme (PUL).                                                      | Os04g0164900 | 0.43 | 64.29    | 0.000 |
| 48 | Heat shock protein DnaJ family protein.                                               | Os08g0374400 | 0.44 | 18.58    | 0.004 |
| 49 | Caffeic acid 3-O-methyltransferase                                                    | Os04g0176100 | 0.44 | 195.11   | 0.010 |
| 50 | miRNA                                                                                 | osa-miR535   | 0.44 | 10.48    | 0.012 |
