# Supplementary material
Source: PubMed Central journal article supplement (PMC4378175)
Supplement: supp_pp.15.00021_00021revsupptbl5.pdf [file supp_pp.15.00021_00021revsupptbl5.pdf]

**Supplemental Table S5.** Data of expression analysis of starch synthesis related genes by microarray.

The expression of selected genes in transgenic rice was shown as the ratio of change relative to non-transgenic rice. Values are expressed as mean of four replicates. RAP-ID and probe name (Genbank accession No. of mRNA sequence) are shown. *AGPS2a* and *AGPS2b* are splice variants of *AGPS2*. Differentially expressed genes were statistically determined based on the t-test and ratio of change criteria (FDR corrected  $P < 0.05$  and ratio of change  $> 2$ ).

| Gene name     | RAP-ID       | Probe name | Ratio of change |       | P-value |       |
|---------------|--------------|------------|-----------------|-------|---------|-------|
|               |              |            | OX1             | RNAi1 | OX1     | RNAi1 |
| <i>AGPL1</i>  | Os05g0580000 | AK100910   | 4.35            | 0.18  | 0.028   | 0.004 |
| <i>AGPL2</i>  | Os01g0633100 | AK071497   | 0.91            | 0.89  | 0.076   | 0.085 |
| <i>AGPL3</i>  | Os03g0735000 | AK105092   | 1.04            | 1.20  | 0.088   | 0.082 |
| <i>AGPL4</i>  | Os07g0243200 | D21272     | 1.80            | 0.92  | 0.078   | 0.087 |
| <i>AGPS1</i>  | Os09g0298200 | AK073146   | 3.54            | 0.38  | 0.032   | 0.012 |
| <i>AGPS2a</i> | Os08g0345800 | AK071826   | 0.82            | 0.79  | 0.053   | 0.039 |
| <i>AGPS2b</i> |              | AK103906   | 0.97            | 0.81  | 0.085   | 0.054 |
| <i>SSI</i>    | Os06g0160700 | AK109458   | 1.45            | 0.88  | 0.039   | 0.073 |
| <i>SSIIa</i>  | Os06g0229800 | AK101978   | 2.83            | 0.87  | 0.052   | 0.087 |
| <i>SSIIb</i>  | Os02g0744700 | AK066446   | 0.86            | 0.88  | 0.057   | 0.064 |
| <i>SSIIc</i>  | Os10g0437600 | AF383878   | 0.96            | 0.96  | 0.086   | 0.088 |
| <i>SSIIIa</i> | Os08g0191500 | AK061604   | 1.05            | 1.02  | 0.086   | 0.089 |
| <i>SSIIIb</i> | Os04g0624600 | AK059368   | 1.20            | 0.91  | 0.072   | 0.088 |
| <i>SSIVa</i>  | Os01g0720600 | AK066808   | 0.94            | 0.86  | 0.074   | 0.085 |
| <i>SSIVb</i>  | Os05g0533600 | AY373258   | 1.16            | 1.07  | 0.069   | 0.088 |
| <i>GBSSI</i>  | Os06g0133000 | AK070431   | 2.58            | 0.79  | 0.044   | 0.082 |
| <i>GBSSII</i> | Os07g0412100 | AK067654   | 1.55            | 0.71  | 0.043   | 0.079 |
| <i>BEI</i>    | Os06g0726400 | AK068920   | 2.37            | 0.38  | 0.046   | 0.005 |
| <i>BEIIa</i>  | Os04g0409200 |            | 1.27            | 0.73  | 0.040   | 0.044 |
| <i>BEIIb</i>  | Os02g0528200 | D16201     | 2.93            | 1.59  | 0.046   | 0.077 |
| <i>GPT1</i>   | Os08g0187800 | AK060577   | 1.91            | 0.83  | 0.009   | 0.063 |
| <i>GPT2</i>   | Os07g0523600 | AK059906   | 2.16            | 0.63  | 0.036   | 0.071 |
| <i>ISA1</i>   | Os08g0520900 | AB015615   | 1.45            | 0.80  | 0.060   | 0.067 |
| <i>ISA2</i>   | Os05g0393700 |            | 1.24            | 1.29  | 0.080   | 0.088 |
| <i>ISA3</i>   | Os09g0469400 | AK106986   | 1.56            | 1.30  | 0.073   | 0.086 |
| <i>PUL</i>    | Os04g0164900 | D50602     | 3.05            | 0.43  | 0.044   | 0.005 |
| <i>Pho1</i>   | Os03g0758100 | AK063766   | 2.82            | 0.30  | 0.029   | 0.011 |
| <i>Pho2</i>   | Os01g0851700 | AK105410   | 1.02            | 0.64  | 0.087   | 0.019 |
