# Supplementary material
Source: PubMed Central journal article supplement (PMC4378175)
Supplement: supp_pp.15.00021_00021revsupptbl6.pdf [file supp_pp.15.00021_00021revsupptbl6.pdf]

**Supplemental Table S6.** Data of expression analysis of starch degradation related genes by microarray.

The expression of selected genes in transgenic rice is shown as the ratio of change relative to non-transgenic rice. Values are expressed as mean of four replicates. RAP-ID and probe name (Genbank accession No. of mRNA sequence) are shown. Differentially expressed genes were statistically determined based on the t-test and ratio of change criteria (FDR corrected  $P < 0.05$  and ratio of change  $> 2$ ).

| Gene name                        | RAP-ID       | Probe name | Ratio of change |       | P-value |       |
|----------------------------------|--------------|------------|-----------------|-------|---------|-------|
|                                  |              |            | OX1             | RNAi1 | OX1     | RNAi1 |
| <i><math>\alpha</math>-Amy1A</i> | Os02g0765600 | AK101744   | 1.00            | 1.00  | 0.069   | 0.088 |
| <i><math>\alpha</math>-Amy1C</i> | Os02g0765300 | M81143     | 0.96            | 0.69  | 0.081   | 0.088 |
| <i><math>\alpha</math>-Amy2A</i> | Os06g0713800 | AK059671   | 0.75            | 0.94  | 0.047   | 0.088 |
| <i><math>\alpha</math>-Amy3A</i> | Os09g0457400 | AK063988   | 1.00            | 1.00  | 0.071   | 0.088 |
| <i><math>\alpha</math>-Amy3B</i> | Os09g0457600 | CI048168   | 1.00            | 0.76  | 0.074   | 0.087 |
| <i><math>\alpha</math>-Amy3C</i> | Os09g0457800 | AK101358   | 0.99            | 0.98  | 0.088   | 0.088 |
| <i><math>\alpha</math>-Amy3D</i> | Os08g0473900 | AK073487   | 1.25            | 1.45  | 0.088   | 0.088 |
| <i><math>\alpha</math>-Amy3E</i> | Os08g0473600 | AK064071   | 1.00            | 1.00  | 0.072   | 0.088 |
| <i><math>\beta</math>-Amy1</i>   | Os07g0543300 |            | 0.66            | 0.61  | 0.076   | 0.068 |
| <i><math>\beta</math>-Amy2</i>   | Os10g0465700 | AK067249   | 1.61            | 0.87  | 0.078   | 0.085 |
| <i><math>\beta</math>-Amy3</i>   | Os03g0141200 | AK068968   | 2.11            | 1.37  | 0.041   | 0.088 |
| <i><math>\beta</math>-Amy4</i>   | Os01g0236800 | CI165105   | 1.11            | 0.98  | 0.068   | 0.088 |
| <i><math>\beta</math>-Amy5</i>   | Os10g0565200 | CI411567   | 3.22            | 3.53  | 0.084   | 0.074 |
| <i><math>\beta</math>-Amy6</i>   | Os07g0543100 |            | 0.91            | 0.86  | 0.074   | 0.087 |
| <i><math>\beta</math>-Amy7</i>   | Os07g0667100 | CI278377   | 1.00            | 1.00  | 0.079   | 0.088 |
| <i><math>\beta</math>-Amy8</i>   | Os09g0569200 | AK070300   | 1.28            | 1.00  | 0.005   | 0.089 |
| <i><math>\beta</math>-Amy9</i>   | Os03g0351300 |            | 1.31            | 0.99  | 0.075   | 0.088 |
| <i>DPE1</i>                      | Os07g0627000 | CI467546   | 2.73            | 0.53  | 0.037   | 0.027 |
| <i>DPE2</i>                      | Os07g0662900 | AK067082   | 1.25            | 0.72  | 0.061   | 0.032 |
| <i>GWD</i>                       | Os06g0498400 | AK058235   | 1.09            | 0.77  | 0.079   | 0.029 |
| <i>PWD</i>                       | Os12g0297500 | AK072331   | 0.88            | 0.97  | 0.049   | 0.088 |
| <i>SEX4-like1</i>                | Os11g0113100 | AK072567   | 0.94            | 0.99  | 0.075   | 0.088 |
| <i>SEX4-like2</i>                | Os08g0379300 | AK072357   | 1.09            | 1.08  | 0.077   | 0.088 |
| <i>pGlcT</i>                     | Os01g0133400 | AK065247   | 0.96            | 0.91  | 0.076   | 0.074 |
| <i>MT</i>                        | Os04g0602400 | AK071005   | 1.11            | 0.77  | 0.068   | 0.055 |
