# Supplementary material
Source: PubMed Central journal article supplement (PMC4378175)
Supplement: supp_pp.15.00021_00021supptbl7.pdf [file supp_pp.15.00021_00021supptbl7.pdf]

- 1 **Supplemental Table S7.** The primers used in this study.  
 2 Extra nucleotides attached to introduce restriction sites or CACC for directional cloning using  
 3 pENTR vector are underlined.

| Purpose and primer name | Primer sequence                              |
|-------------------------|----------------------------------------------|
| RT-PCR                  |                                              |
| CRCT-F1                 | 5'-GATCCAGTTGCAGCAGCCA-3'                    |
| CRCT-R1                 | 5'-AGAGGACGAGCTGCCAGTGA-3'                   |
| GBSSII F1               | 5'-CCGGCATTCCAAGAAATGG-3'                    |
| GBSSII R1               | 5'-ACTTCTGAGCTCGCCACCGG-3'                   |
| Actin-F1                | 5'-GCAACTGGGATGATATGGAGAA-3'                 |
| Actin-R1                | 5'-TACAGTGTCTGGATTGGAGG-3'                   |
| Overexpression          |                                              |
| CRCT-F2+Sp              | 5'- <u>GCGACTAGT</u> GCTTCCGCCTTGTTCAATAA-3' |
| CRCT-R2                 | 5'-TGGATCGTCTCCTTCTACTA-3'                   |
| RNAi knockdown          |                                              |
| iCR-F1                  | 5'- <u>CACCTAAGAGGAAGAAACAAATTA</u> -3'      |
| iCR-R1                  | 5'-AGATAATGGATGCCTTCCAG-3'                   |
| Promoter:GUS            |                                              |
| CRCT-GUS F1+Hd          | 5'- <u>GCGCAAGCTT</u> GTGTCCACGGCCGATTATT-3' |
| CRCT-GUS R1             | 5'-GCGGTGGTGTAGATGCAGGAG-3'                  |
| qRT-PCR                 |                                              |
| OsAGPL1-F1              | 5'-GGTTGGAAGGAACGTGGTCA-3'                   |
| OsAGPL1-R1              | 5'-TGCAGGTCAGGGTTCAGAG-3'                    |
| OsAGPS1-F1              | 5'-CCAAGAAGCTTCAAGGGAGAG-3'                  |
| OsAGPS1-R1              | 5'-TGCAGAGCTTGGTGAACCTGG-3'                  |
| OsPho1-F1               | 5'-CCAGCTACATTGAATGCCAG-3'                   |
| OsPho1-R1               | 5'-CTAGTGCTTGCCTTGCCTGT-3'                   |
| OsSSI-F1                | 5'-ACAAGTCCTCTTGGGAGGGT-3'                   |
| OsSSI-R1                | 5'-CTGGTTCCCTTCCATGTAG-3'                    |
| OsBEI-F1                | 5'-TGGCCATGGAAGAGTTGGC-3'                    |
| OsBEI-R1                | 5'-CAGAAGCAACTGCTCCACC-3'                    |
| OsBEIIa-F1              | 5'-GCCAATGCCAGGAAGATGA-3'                    |
| OsBEIIa-R1              | 5'-GCGCAACATAGGATGGGTTT-3'                   |
| OsGPT2-F1               | 5'-CCGTCATTGTCGCCTCCATC-3'                   |

|              |                               |
|--------------|-------------------------------|
| LAZY-F1      | 5'-ACTGGATCAAGACTGATGCCGAC-3' |
| LAZY-R1      | 5'-ACAGCACATTCAAGCCCTTC-3'    |
| TAC1-F1      | 5'-ACGTCAAAGCCGCTGAAGG-3'     |
| TAC1-R1      | 5'-AGCATTATGCAGTGACAGG-3'     |
| LPA1-F1      | 5'-GCGTATGTATGTAAAGCAAG-3'    |
| LPA1-R1      | 5'-GAAACGACCTACGAAACTAC-3'    |
| Os18SrRNA-F1 | 5'-AAGGAATTGACGGAAGGGCA-3'    |
| Os18SrRNA-R1 | 5'-ATGATCTATCCCCATCACGA-3'    |

---

4
